# Supplementary material
Source: MDPI journal article supplement (https://www.mdpi.com/2077-0472/11/8/688)
Supplement: s1 [file s1]

**Table S1.** Two-way analysis of variance for the reduction in chlorophyll fluorescence (% of control) of pea plants treated with simulated mesotrione residues applied to soil at pH 7.0 and pH 5.0

| Source of variation  | df | SS      | MS     | F <sub>exp.</sub> | <i>p</i> * |
|----------------------|----|---------|--------|-------------------|------------|
| Replication          | 3  | 7.3     | 2.5    |                   |            |
| Mesotrione rate      | 6  | 10390.2 | 1731.7 | 1238.0            | < 0.001    |
| pH                   | 1  | 3491.3  | 3491.3 | 2496.0            | < 0.001    |
| Mesotrione rate x pH | 6  | 321.3   | 53.6   | 38.3              | < 0.001    |
| Error                | 39 | 54.6    | 1.39   |                   |            |

df – degrees of freedom; SS – Sum of Squares; MS – Mean Square; F<sub>exp</sub> - experimental Fisher quotient

\*significant F-test for  $p < 0.001$

**Table S2.** Two-way analysis of variance for the reduction in aboveground dry biomass (% of control) of pea plants treated with simulated mesotrione residues applied to soil at pH 7.0 and pH 5.0

| Source of variation  | df | SS      | MS     | F <sub>exp.</sub> | <i>p</i> * |
|----------------------|----|---------|--------|-------------------|------------|
| Replication          | 3  | 0.4     | 0.1    |                   |            |
| Mesotrione rate      | 6  | 14071.9 | 2345.3 | 853.8             | < 0.001    |
| pH                   | 1  | 3038.5  | 3038.5 | 1106.1            | < 0.001    |
| Mesotrione rate x pH | 6  | 37.4    | 6.2    | 2.3               | 0.05       |
| Error                | 39 | 107.1   | 2.7    |                   |            |

df – degrees of freedom; SS – Sum of Squares; MS – Mean Square; F<sub>exp</sub> - experimental Fisher quotient

\*significant F-test for  $p < 0.001$ ; significant F-test for  $p = 0.05$
